# Supplementary material for: Synthetic high-density lipoproteins as targeted monotherapy for chronic lymphocytic leukemia
Source: PubMed Central journal article supplement (PMC5355259; doi:10.18632/oncotarget.14494), 2017-01-04
Supplement: oncotarget-08-11219-s001.pdf [file oncotarget-08-11219-s001.pdf]

# Synthetic high-density lipoproteins as targeted monotherapy for chronic lymphocytic leukemia

## Supplementary Materials

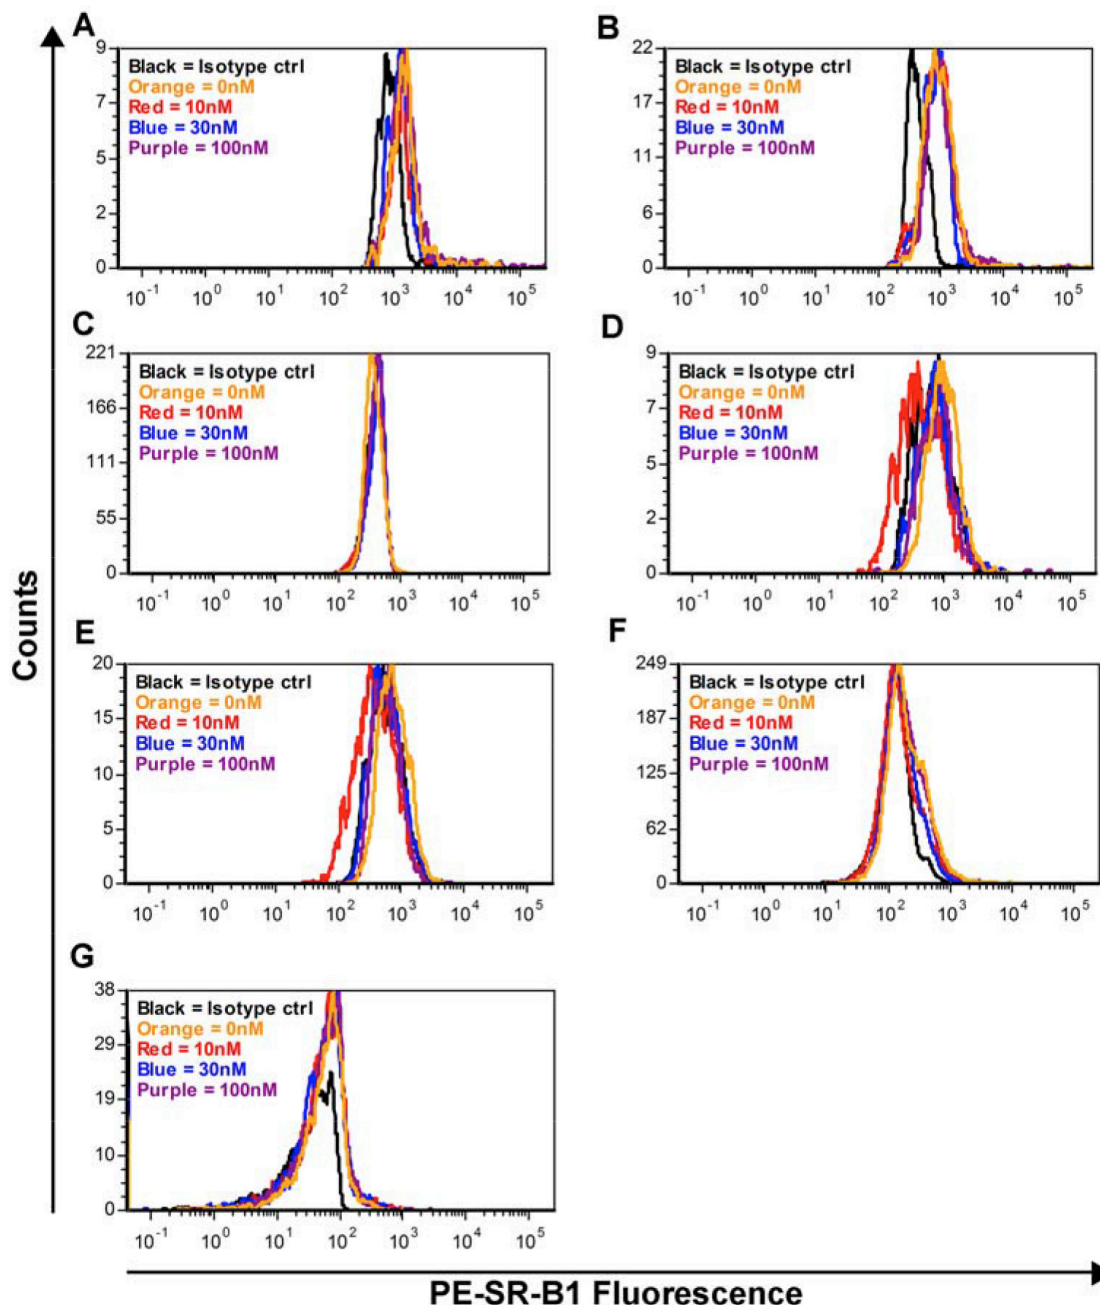

**Supplementary Figure S1: SR-B1 expression in PBMC types with and without HDL NP treatment.** Antibody labeling of SR-B1 expression in PBMC cell types in the presence [10 nM (red), 30 nM (blue), or 100 nM (purple)] or absence [0 nM (orange)] of HDL NPs compared to isotype control (black). (A) Eosinophils, (B) immature granulocytes, (C) CD16- monocytes, (D) CD16+ monocytes, (E) cytotoxic T-cells, (F) non-cytotoxic T-cells, and (G) myeloid precursor cells.

**Supplemental Table 1: Fluorescent antibodies used for identification of total PBMCs by flow cytometry**

| <b>Antibody</b>                      | <b>Catalog number</b> |
|--------------------------------------|-----------------------|
| APC anti-human CD2                   | BioLegend, 300214     |
| APC anti-human CD294 (CRTH2)         | BioLegend, 350110     |
| Brilliant Violet 711 anti-human CD16 | BioLegend, 302043     |
| FITC anti-human CD36                 | BioLegend, 336204     |
| Pacific Blue anti-human CD19         | BioLegend, 302224     |
| PE/Cy7 anti-human CD45               | BioLegend, 304016     |
| PE anti-human CD36L1 (SCARB1, SR-BI) | BioLegend, 363204     |
